# Supplementary material for: Surface sensitization of g-C3N4/TiO2via Pd/Rb2O co-catalysts: accelerating water splitting reaction for green fuel production in the absence of organic sacrificial agents
Source: Royal Society of Chemistry journal article supplement (doi:10.1039/d3re00238a), 2023-01-01
Supplement: d3re00238a1.pdf [file d3re00238a1.pdf]

## SUPPORTING INFORMATION

### **Surface sensitization of g-C<sub>3</sub>N<sub>4</sub>/TiO<sub>2</sub> via Pd/Rb<sub>2</sub>O cocatalysts: Accelerating water splitting reaction for green fuel production in the absence of organic sacrificial agents**

KashafUl Sahar<sup>a</sup>, KhezinaRafiq<sup>a\*</sup>, Muhammad Zeeshan Abid<sup>a</sup>, Abdul Rauf<sup>a</sup>, Ubaid urRehman<sup>b</sup>,  
Ejaz Hussain<sup>a\*</sup>

<sup>a</sup>Institute of Chemistry, Inorganic Materials Laboratory 52S, The Islamia University of Bahawalpur-63100, Pakistan

<sup>b</sup>Institute of Physics, Polish Academy of Sciences, Al. Lotników32/46, 02-668 Warsaw, Poland

Corresponding authors email: [ejaz.hussain@iub.edu.pk](mailto:ejaz.hussain@iub.edu.pk)

## Section 1

### Chemicals required:

All chemicals (analytical grade) used in this work were purchased from commercial sources, and utilized with no additional modification or purification. Melamine was purchased from Hqaiang Chemical Group Stock Co., LTD, and rutile  $\text{TiO}_2$  from Texan Minerals & Chemicals. The salt of palladium (II) acetate was purchased from CATO Research Chemicals Inc and 99%  $\text{RbCl}$  (Alfa Aesar, CAS Number 7791-11-9), hydrogen chloride solution (CAS-7647-01-0) and sodium hydroxide (CAS-1310-73-2) from Sigma Aldrich. The high-purity deionized water was facilitated by PIAS Pakistan (PIAS-GW1-Z)

## Section 2

### Instruments for characterization:

The powder XRD pattern was recorded on an X-ray diffractometer with Ni filtered utilizing Cu-K $\alpha$  radiation ( $\lambda = 1.5418\text{\AA}$ , 40 mA, 40kV). Data was collected by utilizing a flat-plate sample holder in Bragg–Brentano para-focusing geometry. The Fourier transform infrared spectra obtained by KBr tablet in Nicolet avatar 330 FT-IR spectrometer with the unit of  $\text{cm}^{-1}$ . The chemical composition and morphology were analyzed by SEM images taken by Thermo Fisher AxiaChemiSEM. Diffuse reflectance UV-vis absorption spectra of powdered catalysts obtained from UV-Vis spectrophotometer manufactured by Thermo Fischer Scientific and mounded with the praying mantis diffuse reflectance adapter. X-Ray photoelectron spectroscopy measurements were obtained by using Kratos Axis UltraDLD coupled with a hemispherical deflection analyzer and chamber for analysis. The monochromated Al K $\alpha$  (1486.6 – 69 eV) was produced by X-rays using a source that put out 150 W and was utilized for the excitation of the samples (catalysts). For analysis, the samples were carefully pressed into small pellets (0.1 mm width). Raman spectra of the catalysts obtained from Horiba JY LabRAM HR 800 Raman spectrometer joined with a microscope in reflectance mode (632.8 nm), He-Ne laser (20 mV) with a spectral resolution of  $0.35\text{ cm}^{-1}$  and no filter. Additionally, the D4 filter was used to enhance the characteristics of g-C $_3$ N $_4$ , between 1300 – 1800  $\text{cm}^{-1}$ . All the catalysts were analyzed at room temperature in the same glass vial to ensure consistent results. The photoluminescence spectroscopy from Custom Cryogenic Macro PL System (CCMPS) coupled with HORIBA components (325 nm laser). The iHR320 was an imaging spectrometer and detection was made by Sincerity CCD. PL is used to examine, whether the as-prepared photocatalysts are appropriate for photocatalytic activity. The electronic structure and band gap of the photocatalysts were obtained from PL. Atomic force microscopy was done by PARK N $\times$ 10 instrument to determine the mechanical properties and localization of the loaded metals on the surface of photocatalysts. The specified surface area and the diameters of the pores were analyzed by BrunauerEmmet Teller (BET) technique.

### Section 3

#### Factors affecting the H<sub>2</sub> production activity of photocatalysts

**Effect of intensity of light:** The water splitting reaction for hydrogen production was performed under sunlight [1, 2]. The hydrogen production efficiency of the photocatalysts is directly proportional to the intensity of light [3]. In the current research, the reactions were performed for 6 hours under solar radiation [4] as shown in Table S1 and Fig S1. The maximum evolution of hydrogen of 19.7 mmol g<sup>-1</sup>h<sup>-1</sup> was recorded in the 4<sup>th</sup> hour of reaction from 1:00 PM-2:00 PM.

**Table S1.** Effect of intensity of light on H<sub>2</sub> evolution by most active photocatalyst in different hours under solar light

| Serial No | Photocatalyst                                                          | Time under solar light | H <sub>2</sub> Evolution (mmol g <sup>-1</sup> h <sup>-1</sup> ) |
|-----------|------------------------------------------------------------------------|------------------------|------------------------------------------------------------------|
| 1         | Pd-Rb <sub>2</sub> O@g-C <sub>3</sub> N <sub>4</sub> /TiO <sub>2</sub> | 10:00 AM-11:00 AM      | 6.64                                                             |
| 2         | Pd-Rb <sub>2</sub> O@g-C <sub>3</sub> N <sub>4</sub> /TiO <sub>2</sub> | 11:00 AM-12:00 PM      | 10.3                                                             |
| 3         | Pd-Rb <sub>2</sub> O@g-C <sub>3</sub> N <sub>4</sub> /TiO <sub>2</sub> | 12:00 PM-1:00 PM       | 14.7                                                             |
| 4         | Pd-Rb <sub>2</sub> O@g-C <sub>3</sub> N <sub>4</sub> /TiO <sub>2</sub> | 1:00 PM-2:00 PM        | 19.7                                                             |
| 5         | Pd-Rb <sub>2</sub> O@g-C <sub>3</sub> N <sub>4</sub> /TiO <sub>2</sub> | 2:00 PM-3:00 PM        | 15.4                                                             |
| 6         | Pd-Rb <sub>2</sub> O@g-C <sub>3</sub> N <sub>4</sub> /TiO <sub>2</sub> | 3:00 PM-4:00 PM        | 11.1                                                             |

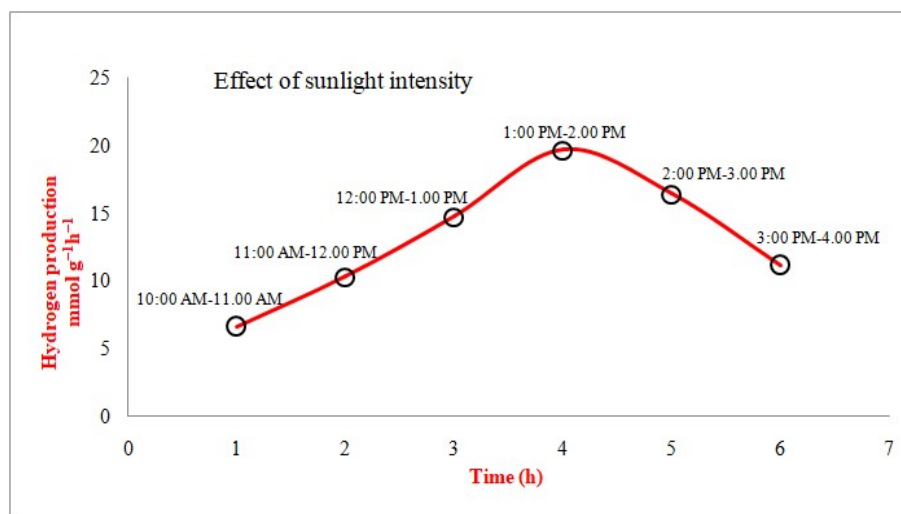

**Fig S1:** Effect of intensity of light on H<sub>2</sub> evolution by most active photocatalyst in different h under solar light.

**Effect of the work function of cocatalysts:** The Schottky barrier originates between the metal and semiconductor when the work function of the loaded metal is higher than that of the semiconductor. The work functions of g-C<sub>3</sub>N<sub>4</sub> and rutile TiO<sub>2</sub> are 4.62 eV and 4.2 eV as shown in Fig 9 in the main manuscript. In current research work, we have found that the high work function of palladium was a key character in efficient H<sub>2</sub> production [5, 6]. The work function of palladium metal is 5.55 eV [7]. To evaluate the difference in hydrogen generation, we have experimented with other metals (metals with low work functions as compared to palladium i.e., Cu, Ni, Ru, and Ag) by loading them on the surface of g-C<sub>3</sub>N<sub>4</sub>/TiO<sub>2</sub>. The rate of hydrogen production decreases with the decrease in the work function ( $\Phi$ ) of loaded metals [8] as shown in Table S2 and Fig S2.

**Table S2.** Effect of the work function of different loaded metals on the support surface (g-C<sub>3</sub>N<sub>4</sub>/TiO<sub>2</sub>) on hydrogen generation (mmol g<sup>-1</sup>)

| Metal cocatalyst | Work function ( $\Phi$ ) | Hydrogen production (mmol g <sup>-1</sup> h <sup>-1</sup> ) |
|------------------|--------------------------|-------------------------------------------------------------|
| Pd               | 5.55 eV                  | 19.7                                                        |
| Cu               | 5.10 eV                  | 17.3                                                        |
| Ni               | 5.01 eV                  | 15.6                                                        |
| Ru               | 4.71 eV                  | 12.6                                                        |
| Ag               | 4.26 eV                  | 10.6                                                        |

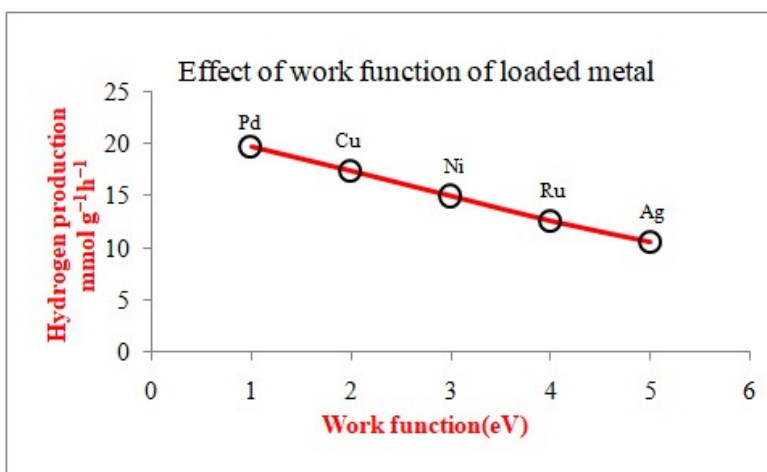

**Fig S2:** Graphical representation of the effect of work function of different loaded metals on the support surface (g-C<sub>3</sub>N<sub>4</sub>/TiO<sub>2</sub>) on hydrogen generation (mmol g<sup>-1</sup>).

**Effect of pH:** The pH is the concentration of  $H^+$  ions present in the solution and the hydrogen production is also affected by the pH [9-11]. Photocatalytic reaction performed at pH 8 where the maximum hydrogen evolution was recorded. While at the high and low pH, the rate of hydrogen evolution reduced, respectively, as shown in Fig S3 and Table S3. The optimized pH analyzed in this current work was pH 8.

**Table S3.** Effect of pH on hydrogen evolution ( $mmol\ g^{-1}h^{-1}$ ) by using most active photocatalysts

| Photocatalyst                                                            | pH   | $H_2$ Evolution ( $mmol\ g^{-1}h^{-1}$ ) |
|--------------------------------------------------------------------------|------|------------------------------------------|
| Pd-Rb <sub>2</sub> O@g-C <sub>3</sub> N <sub>4</sub> /TiO <sub>2</sub>   | 4.0  | 4.45                                     |
| ≈ Pd-Rb <sub>2</sub> O@g-C <sub>3</sub> N <sub>4</sub> /TiO <sub>2</sub> | 5.0  | 7.98                                     |
| Pd-Rb <sub>2</sub> O@g-C <sub>3</sub> N <sub>4</sub> /TiO <sub>2</sub>   | 6.0  | 11.9                                     |
| Pd-Rb <sub>2</sub> O@g-C <sub>3</sub> N <sub>4</sub> /TiO <sub>2</sub>   | 7.0  | 15.6                                     |
| Pd-Rb <sub>2</sub> O@g-C <sub>3</sub> N <sub>4</sub> /TiO <sub>2</sub>   | 8.0  | 19.7                                     |
| Pd-Rb <sub>2</sub> O@g-C <sub>3</sub> N <sub>4</sub> /TiO <sub>2</sub>   | 9.0  | 17.3                                     |
| Pd-Rb <sub>2</sub> O@g-C <sub>3</sub> N <sub>4</sub> /TiO <sub>2</sub>   | 10.0 | 14.5                                     |

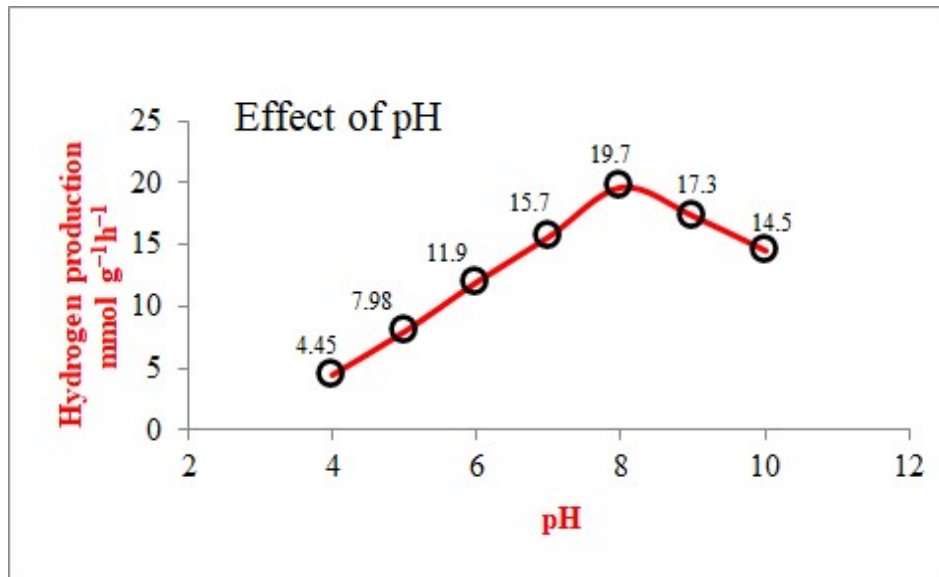

**Fig S3:** Effect of pH on hydrogen evolution ( $mmol\ g^{-1}h^{-1}$ ) by using most active photocatalysts

**Effect of sacrificial reagent:** We have investigated different sacrificial reagents to evaluate their effects on the hydrogen evolution rate [12, 13]. In the current study, the maximum hydrogen

produced is  $\sim 19 \text{ mmol g}^{-1} \text{ h}^{-1}$   $\text{Rb}_2\text{O}$  utilized as a cocatalyst as represented in, Table S4 and Fig S4.

**Table S4.** Effect of nature of sacrificial reagent on hydrogen evolution ( $\text{mmol g}^{-1} \text{ h}^{-1}$ ) by using as-synthesized photocatalysts

| Photocatalyst                                         | Sacrificial reagent              | $\text{H}_2$ Evolution ( $\text{mmol g}^{-1} \text{ h}^{-1}$ ) |
|-------------------------------------------------------|----------------------------------|----------------------------------------------------------------|
| $\text{Pd@g-C}_3\text{N}_4/\text{TiO}_2$              | Glycerol                         | 11.7                                                           |
| $\text{Pd@g-C}_3\text{N}_4/\text{TiO}_2$              | $\text{Na}_2\text{S}$            | 12.8                                                           |
| $\text{Pd@g-C}_3\text{N}_4/\text{TiO}_2$              | $\text{S}^{2-}/\text{SO}_3^{2-}$ | 14.1                                                           |
| $\text{Pd@g-C}_3\text{N}_4/\text{TiO}_2$              | Methanol                         | 16.3                                                           |
| $\text{Pd@g-C}_3\text{N}_4/\text{TiO}_2$              | Ethanol                          | 17.4                                                           |
| $\text{Pd-Rb}_2\text{O@g-C}_3\text{N}_4/\text{TiO}_2$ | –                                | 19.7                                                           |

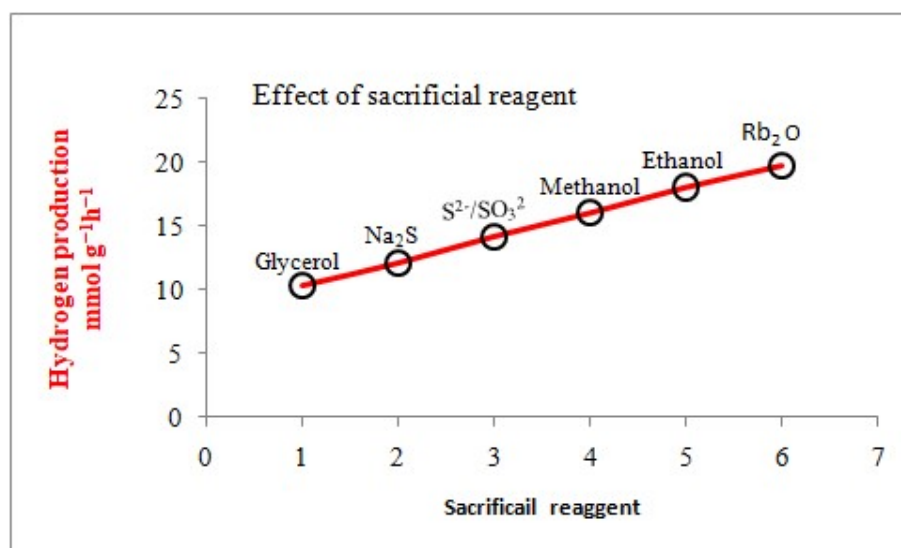

**Fig S4:** Effect of nature of sacrificial reagent on hydrogen evolution ( $\text{mmol g}^{-1} \text{ h}^{-1}$ ) by using as-synthesized photocatalysts

**Effect of dose concentration:** We examined the effect dose concentration on the hydrogen production via water splitting reaction [13, 14]. In current research work, of 5 mg was found to be an optimized concentration of photocatalysts which produced  $19.7 \text{ mmol g}^{-1} \text{ h}^{-1}$  of hydrogen as represented in Table S5 and Fig S5.

**Table S5.** Effect of photocatalysts dose on hydrogen evolution ( $\text{mmol g}^{-1}\text{h}^{-1}$ ) by using as-synthesized photocatalysts

| photocatalyst                                                          | Concentration | Hydrogen evolution ( $\text{mmol g}^{-1}\text{h}^{-1}$ ) |
|------------------------------------------------------------------------|---------------|----------------------------------------------------------|
| Pd-Rb <sub>2</sub> O@g-C <sub>3</sub> N <sub>4</sub> /TiO <sub>2</sub> | 1 mg          | 7.69                                                     |
| Pd-Rb <sub>2</sub> O@g-C <sub>3</sub> N <sub>4</sub> /TiO <sub>2</sub> | 2 mg          | 10.35                                                    |
| Pd-Rb <sub>2</sub> O@g-C <sub>3</sub> N <sub>4</sub> /TiO <sub>2</sub> | 3 mg          | 13.4                                                     |
| Pd-Rb <sub>2</sub> O@g-C <sub>3</sub> N <sub>4</sub> /TiO <sub>2</sub> | 4 mg          | 16.5                                                     |
| Pd-Rb <sub>2</sub> O@g-C <sub>3</sub> N <sub>4</sub> /TiO <sub>2</sub> | 5 mg          | 19.7                                                     |
| Pd-Rb <sub>2</sub> O@g-C <sub>3</sub> N <sub>4</sub> /TiO <sub>2</sub> | 6 mg          | 18.9                                                     |
| Pd-Rb <sub>2</sub> O@g-C <sub>3</sub> N <sub>4</sub> /TiO <sub>2</sub> | 7 mg          | 17.6                                                     |
| Pd-Rb <sub>2</sub> O@g-C <sub>3</sub> N <sub>4</sub> /TiO <sub>2</sub> | 8 mg          | 15.4                                                     |

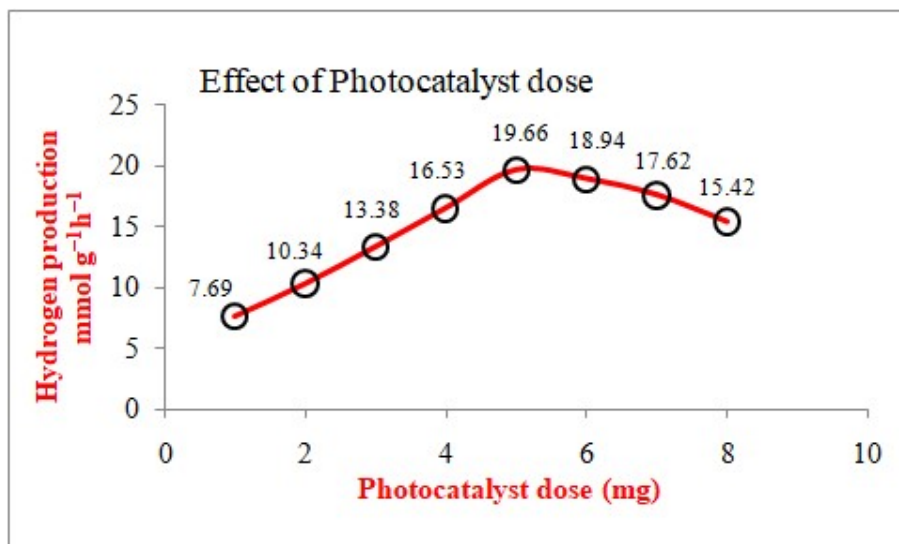

**Fig S5:** Effect of photocatalysts dose on hydrogen evolution ( $\text{mmol g}^{-1}\text{h}^{-1}$ ) by using as-synthesized photocatalysts



## Section 4

**Table S6.** Recyclability test for the most active photocatalyst (Pd-Rb<sub>2</sub>O@g-C<sub>3</sub>N<sub>4</sub>/TiO<sub>2</sub>)

| Photocatalyst<br>(Pd-Rb <sub>2</sub> O@g-C <sub>3</sub> N <sub>4</sub> /TiO <sub>2</sub> ) | Time (h) |      |      |      |      |       | H <sub>2</sub> generation |
|--------------------------------------------------------------------------------------------|----------|------|------|------|------|-------|---------------------------|
|                                                                                            | 1        | 2    | 3    | 4    | 5    | 6     |                           |
| 1 <sup>st</sup> run                                                                        | 13.5     | 34.6 | 55.8 | 76.6 | 97.3 | 118.0 | mmol g <sup>-1</sup>      |
| 2 <sup>nd</sup> run                                                                        | 12.5     | 32.6 | 52.8 | 72.6 | 92.3 | 112.0 | mmol g <sup>-1</sup>      |
| 3 <sup>rd</sup> run                                                                        | 11.5     | 30.6 | 49.8 | 68.6 | 87.3 | 106.1 | mmol g <sup>-1</sup>      |

## Section 5

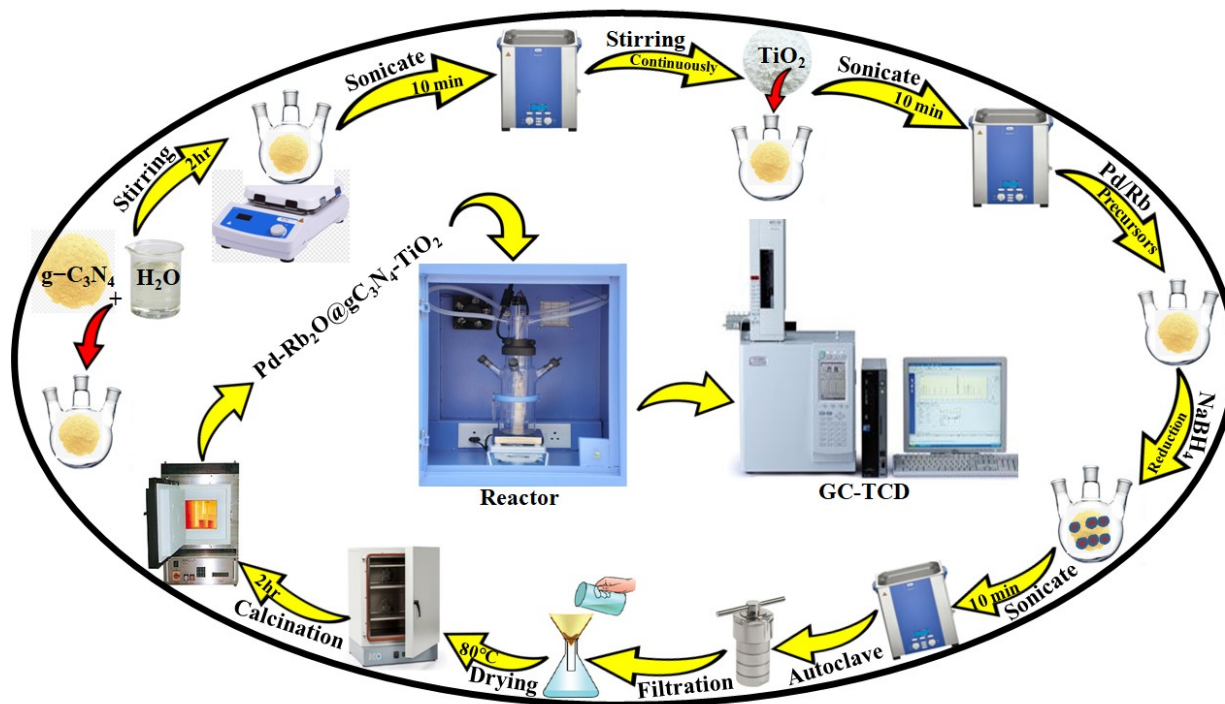

**Fig S6:** The synthesis scheme of Pd-Rb<sub>2</sub>O@g-C<sub>3</sub>N<sub>4</sub>/TiO<sub>2</sub> photocatalysts preparation

## Section 6

**Table S7.** Comparison of quantum efficiency of as-synthesized photocatalysts (Pd-Rb<sub>2</sub>O@g-C<sub>3</sub>N<sub>4</sub>/TiO<sub>2</sub>) with other metal loaded over TiO<sub>2</sub> semiconductor reported in the literature.

| Sr. No | Photocatalyst                                                          | Metal loading | Sacrificial reagent                          | H <sub>2</sub> production (mmol g <sup>-1</sup> h <sup>-1</sup> ) | Quantum yield (%) | Ref.         |
|--------|------------------------------------------------------------------------|---------------|----------------------------------------------|-------------------------------------------------------------------|-------------------|--------------|
| 1.     | Pd-Rb <sub>2</sub> O@g-C <sub>3</sub> N <sub>4</sub> /TiO <sub>2</sub> | 1.8:0.2 wt. % | -                                            | 19.7                                                              | 17.7              | Present work |
| 2.     | Pt/N-TiO <sub>2</sub>                                                  | 1 wt. %       | ethanol                                      | 2.25                                                              | 12.3              | [15]         |
| 3.     | Au@TiO <sub>2</sub>                                                    | 0.25 wt.%     | methanol                                     | 1.25                                                              | 7.5               | [16]         |
| 4.     | CuOH <sub>2</sub> /TiO <sub>2</sub>                                    | 0.29 (mol%)   | C <sub>2</sub> H <sub>6</sub> O <sub>2</sub> | 3.41                                                              | 13.9              | [17]         |
| 5.     | Au@ TiO <sub>2</sub>                                                   | 0.4 wt. %     | methanol                                     | 0.36                                                              | 4.14              | [18]         |
| 6.     | Ni(OH) <sub>2</sub> / TiO <sub>2</sub>                                 | 0.23 (mol%)   | methanol                                     | 0.3                                                               | 12.4              | [19]         |
| 7.     | CuO/TiO <sub>2</sub>                                                   | 10 wt. %      | ethanol                                      | 0.2                                                               | 5.1               | [20]         |

## Section 7

**Various %w/w of Pd and Rb<sub>2</sub>O over g-C<sub>3</sub>N<sub>4</sub>/TiO<sub>2</sub>:** The amount of Pd and Rb<sub>2</sub>O, overall, 2 wt% metal was deposited on the surface of the semiconductor(g-C<sub>3</sub>N<sub>4</sub>/TiO<sub>2</sub>).Pd loading was increased (from 0.2 to 1.8 wt. %) at the same time while retaining the overall, metal nanoparticles loading (2 wt. %). It has been observed that the total amount of palladium deposited on the surface of the semiconductor(g-C<sub>3</sub>N<sub>4</sub>/TiO<sub>2</sub>)affected the rate of hydrogen production. Pd<sub>1.8</sub>-Rb<sub>2</sub>O<sub>0.2</sub>@g-C<sub>3</sub>N<sub>4</sub>/TiO<sub>2</sub> was found to be the most active photocatalyst in the series. The declining Pd (electron quencher) concentration and increasing Rb<sub>2</sub>O concentration up to 1.8 %,ultimately reduced the rate of hydrogen production (GC-TCD experiment). The H<sub>2</sub> generation activities of all photocatalysts including bare TiO<sub>2</sub>, g-C<sub>3</sub>N<sub>4</sub>, g-C<sub>3</sub>N<sub>4</sub>/TiO<sub>2</sub>, Pd<sub>0.2</sub>-Rb<sub>2</sub>O<sub>1.8</sub>@g-C<sub>3</sub>N<sub>4</sub>/TiO<sub>2</sub>, Pd<sub>0.4</sub>-Rb<sub>2</sub>O<sub>1.6</sub>@g-C<sub>3</sub>N<sub>4</sub>/TiO<sub>2</sub>, Pd<sub>0.8</sub>-Rb<sub>2</sub>O<sub>1.2</sub>@g-C<sub>3</sub>N<sub>4</sub>/TiO<sub>2</sub>, Pd<sub>1.2</sub>-Rb<sub>2</sub>O<sub>0.8</sub>@g-C<sub>3</sub>N<sub>4</sub>/TiO<sub>2</sub>, Pd<sub>1.6</sub>-Rb<sub>2</sub>O<sub>0.4</sub>@g-C<sub>3</sub>N<sub>4</sub>/TiO<sub>2</sub> and Pd<sub>1.8</sub>-Rb<sub>2</sub>O<sub>0.2</sub>@g-C<sub>3</sub>N<sub>4</sub>/TiO<sub>2</sub> are exhibited in mmolg<sup>-1</sup> and mmolg<sup>-1</sup>h<sup>-1</sup>as demonstrated in Table S8.

**Table S8.** H<sub>2</sub> generation activities of as-prepared Pd-Rb<sub>2</sub>O@g-C<sub>3</sub>N<sub>4</sub>/TiO<sub>2</sub>.

| Photocatalysts                                                                                         | Pd: Rb <sub>2</sub> O wt.% ratio | H <sub>2</sub> production (mmol g <sup>-1</sup> ) | H <sub>2</sub> production (mmol g <sup>-1</sup> h <sup>-1</sup> ) |
|--------------------------------------------------------------------------------------------------------|----------------------------------|---------------------------------------------------|-------------------------------------------------------------------|
| TiO <sub>2</sub>                                                                                       | 0                                | 16.4                                              | 2.72                                                              |
| g-C <sub>3</sub> N <sub>4</sub>                                                                        | 0                                | 20.7                                              | 3.44                                                              |
| g-C <sub>3</sub> N <sub>4</sub> /TiO <sub>2</sub>                                                      | 0                                | 64.4                                              | 10.7                                                              |
| Pd <sub>0.2</sub> -Rb <sub>2</sub> O <sub>1.8</sub> @g-C <sub>3</sub> N <sub>4</sub> /TiO <sub>2</sub> | 0.2:1.8                          | 70.2                                              | 11.7                                                              |
| Pd <sub>0.4</sub> -Rb <sub>2</sub> O <sub>1.6</sub> @g-C <sub>3</sub> N <sub>4</sub> /TiO <sub>2</sub> | 0.4:1.6                          | 78.4                                              | 13.1                                                              |
| Pd <sub>0.8</sub> -Rb <sub>2</sub> O <sub>1.2</sub> @g-C <sub>3</sub> N <sub>4</sub> /TiO <sub>2</sub> | 0.8:1.2                          | 81.7                                              | 13.6                                                              |
| Pd <sub>2.0</sub> @g-C <sub>3</sub> N <sub>4</sub> /TiO <sub>2</sub>                                   | 2 wt. %                          | 90.6                                              | 15.1                                                              |
| Pd <sub>1.2</sub> -Rb <sub>2</sub> O <sub>0.8</sub> @g-C <sub>3</sub> N <sub>4</sub> /TiO <sub>2</sub> | 1.2: 0.8                         | 95.1                                              | 15.8                                                              |
| Pd <sub>1.6</sub> -Rb <sub>2</sub> O <sub>0.4</sub> @g-C <sub>3</sub> N <sub>4</sub> /TiO <sub>2</sub> | 1.6: 0.4                         | 101.4                                             | 16.9                                                              |
| Pd <sub>1.8</sub> -Rb <sub>2</sub> O <sub>0.2</sub> @g-C <sub>3</sub> N <sub>4</sub> /TiO <sub>2</sub> | 1.8: 0.2                         | 118.0                                             | 19.7                                                              |

## References:

1. Zhou, P., et al., *Solar-to-hydrogen efficiency of more than 9% in photocatalytic water splitting*. 2023. **613**(7942): p. 66-70.
2. Jawale, N., et al., *Ni loaded SnS 2 hexagonal nanosheets for photocatalytic hydrogen generation via water splitting*. 2023. **13**(4): p. 2418-2426.
3. Ayu, D.G., et al., *Photocatalytic Degradation of Methylene Blue Using N-Doped ZnO/Carbon Dot (N-ZnO/CD) Nanocomposites Derived from Organic Soybean*. 2023.
4. Chong, W.-K., et al., *Non-metal doping induced dual pn charge properties in a single ZnIn<sub>2</sub>S<sub>4</sub> crystal structure provoking charge transfer behaviors and boosting photocatalytic hydrogen generation*. 2023. **325**: p. 122372.
5. Silalahi, R.P.B., et al., *Hydride-containing 2-Electron Pd/Cu Superatoms as Catalysts for Efficient Electrochemical Hydrogen Evolution*. 2023: p. e202301272.
6. Li, L., et al., *Rational design of porous conjugated polymers and roles of residual palladium for photocatalytic hydrogen production*. 2016. **138**(24): p. 7681-7686.
7. Grönbeck, H. and C.J.T.J.o.P.C.C. Barth, *Revealing carbon phenomena at palladium nanoparticles by analyzing the work function*. 2019. **123**(7): p. 4360-4370.
8. Luo, M., et al., *Shape effects of Pt nanoparticles on hydrogen production via Pt/CdS photocatalysts under visible light*. 2015. **3**(26): p. 13884-13891.
9. Ahmed, M.A. and A.A.J.R.a. Mohamed, *Recent progress in semiconductor/graphene photocatalysts: synthesis, photocatalytic applications, and challenges*. 2023. **13**(1): p. 421-439.
10. Paul, D.R., et al., *Mg/Li Co-doped g-C<sub>3</sub>N<sub>4</sub>: An excellent photocatalyst for wastewater remediation and hydrogen production applications towards sustainable development*. 2023.
11. Zhang, C. and C.J.R.A. Xue, *Ligand-assisted morphology regulation of AuNi bimetallic nanocrystals for efficient hydrogen evolution*. 2023. **13**(2): p. 1229-1235.
12. Bajpai, H., et al., *Biomass components toward H<sub>2</sub> and value-added products by sunlight-driven photocatalysis with electronically integrated Au δ--TiO<sub>2</sub>: concurrent utilization of electrons and holes*. 2023.
13. Sabir, A.S., et al., *An inclusive review and perspective on Cu-based materials for electrochemical water splitting*. 2023. **13**(8): p. 4963-4993.
14. Hoang, A.T., et al., *Hydrogen Production by Water Splitting with Support of Metal and Carbon-Based Photocatalysts*. 2023.

15. Wu, M.-C., et al., *Nitrogen-doped anatase nanofibers decorated with noble metal nanoparticles for photocatalytic production of hydrogen*. *Acs Nano*, 2011. **5**(6): p. 5025-5030.
16. Gomes Silva, C.u., et al., *Influence of excitation wavelength (UV or visible light) on the photocatalytic activity of titania containing gold nanoparticles for the generation of hydrogen or oxygen from water*. *Journal of the American Chemical Society*, 2011. **133**(3): p. 595-602.
17. Yu, J. and J. Ran, *Facile preparation and enhanced photocatalytic H<sub>2</sub>-production activity of Cu(OH)<sub>2</sub> cluster modified TiO<sub>2</sub>*. *Energy & Environmental Science*, 2011. **4**(4): p. 1364-1371.
18. Méndez, J.O., et al., *Production of hydrogen by water photo-splitting over commercial and synthesised Au/TiO<sub>2</sub> catalysts*. *Applied Catalysis B: Environmental*, 2014. **147**: p. 439-452.
19. Yu, J., Y. Hai, and B. Cheng, *Enhanced photocatalytic H<sub>2</sub>-production activity of TiO<sub>2</sub> by Ni(OH)<sub>2</sub> cluster modification*. *The Journal of Physical Chemistry C*, 2011. **115**(11): p. 4953-4958.
20. Yu, Z., et al., *Efficient photocatalytic hydrogen production from water over a CuO and carbon fiber comodified TiO<sub>2</sub> nanocomposite photocatalyst*. *International journal of hydrogen energy*, 2013. **38**(36): p. 16649-16655.
